# Supplementary material for: Screening of 5- and 6-Substituted Amiloride Libraries Identifies Dual-uPA/NHE1 Active and Single Target-Selective Inhibitors
Source: PubMed Central journal article supplement (PMC8000185; doi:10.3390/ijms22062999), 2021-03-15
Supplement: ijms-22-02999-s001.pdf [file ijms-22-02999-s001.pdf]

## Supplementary Material

# Screening of 5- and 6-substituted amiloride libraries identifies dual-uPA/NHE1 active and single target-selective inhibitors

Benjamin J. Buckley<sup>1,2,3,4</sup>, Ashna Kumar<sup>1,2,3</sup>, Ashraf Aboelela<sup>1,2</sup>, Richard S. Bujaroski<sup>1,2,3</sup>, Xiuju Li<sup>5</sup>, Hiwa Majed<sup>1,2</sup>, Larry Fliegel<sup>5</sup>, Marie Ranson<sup>1,2,3,4</sup> and Michael J. Kelso<sup>1,2,3\*</sup>

<sup>1</sup> Illawarra Health and Medical Research Institute, Wollongong, NSW 2522, Australia.

<sup>2</sup> School of Chemistry and Molecular Bioscience, University of Wollongong, NSW 2522, Australia.

<sup>3</sup> Molecular Horizons, University of Wollongong, NSW 2522, Australia.

<sup>4</sup> CONCERT-Translational Cancer Research Centre, NSW 2750, Australia.

<sup>5</sup> Department of Biochemistry, University of Alberta, Edmonton, Alberta, T6G 2H7, Canada.

\*Correspondence authors: bbuckley@uow.edu.au, mkelso@uow.edu.au; Tel.: +61-2-4221-5085

### Contents

- (1) **Figure S1.** Structure of BI-9627 and **B)** NHE1 and uPA inhibition curves for BI-9627.
- (2) **Table S1.** POLARstar OMEGA settings used for plate reader uPA and NHE1 inhibition assays.

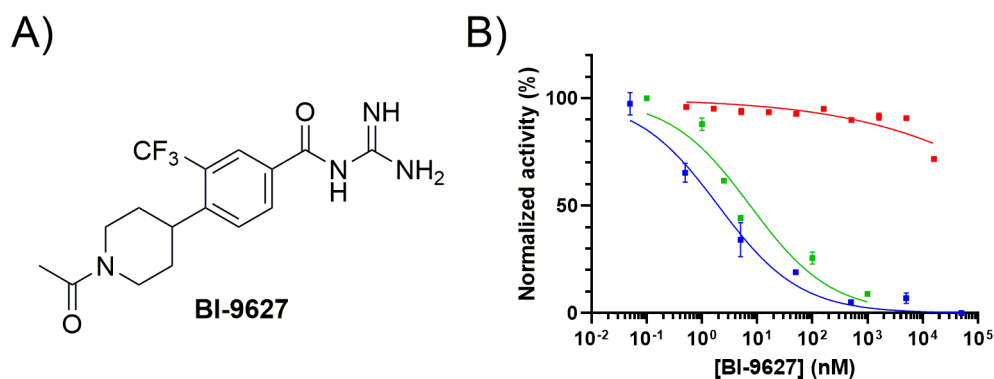

**Figure S1.** Structure of BI-9627 and **B)** NHE1 and uPA inhibition curves for BI-9627. Blue = NHE1 inhibition determined using the plate reader assay. Data points = mean  $\pm$  SEM (n = 3 technical replicates, IC<sub>50</sub> of curve shown = 1.4 nM). Green = NHE1 inhibition determined using the cuvette assay. Data points = mean  $\pm$  SEM (n = 6 technical replicates/concentration, IC<sub>50</sub> = 7.5 nM). Red = inhibition of human uPA activity determined using the reported fluorometric method [25]. Data points = mean  $\pm$  SEM (n = 3 technical replicates). IC<sub>50</sub> was not reached at the highest concentration tested (50  $\mu$ M).

**Table S1.** POLARstar OMEGA settings used for plate reader uPA and NHE1 inhibition assays. <sup>a</sup>biochemical assay using low molecular weight active human uPA. <sup>b</sup>cell-surface assay using exogenous HMW active human uPA.

| Parameter                             | Value                                                                           |          |      |
|---------------------------------------|---------------------------------------------------------------------------------|----------|------|
| uPA inhibition with Z-Gly-Gly-Arg-AMC |                                                                                 |          |      |
| Measurement type                      | fluorescence intensity, top optic                                               |          |      |
| Read mode                             | single excitation, single emission                                              |          |      |
| No. of cycles                         | 60                                                                              |          |      |
| Cycle time                            | 60 seconds                                                                      |          |      |
| Scan mode                             | well average                                                                    |          |      |
| Scan diameter/ No. of flashes         | <sup>a</sup> whole well averaging, 20 flashes per well                          |          |      |
| Plate shake mode                      | <sup>a</sup> double orbital, 3 s prior to each read (600 rpm), <sup>b</sup> off |          |      |
| Assay temperature                     | 37 °C                                                                           |          |      |
| Filter settings                       | Excitation                                                                      | Emission | Gain |
|                                       | 355 $\pm$ 10 nm                                                                 | 450 nm   | 900  |
| NHE1 inhibition assay with BCECF-AM   |                                                                                 |          |      |
| Measurement type                      | fluorescence intensity, top optic                                               |          |      |
| Read mode                             | plate multichromatic                                                            |          |      |
| No. of cycles                         | 5                                                                               |          |      |
| Cycle time                            | 61 seconds                                                                      |          |      |
| Scan mode                             | orbital averaging                                                               |          |      |
| Scan diameter/ No. of flashes         | 1 mm/ 8 flashes per well                                                        |          |      |
| Plate shake mode                      | off                                                                             |          |      |
| Assay temperature                     | 37 °C                                                                           |          |      |
| Filter settings                       | Excitation                                                                      | Emission | Gain |
| 1. pH-sensitive couple                | 485 $\pm$ 12 nm                                                                 | 520 nm   | 1100 |
| 2. Isosbestic couple                  | 440 $\pm$ 10 nm                                                                 | 520 nm   | 1100 |
